# Supplementary material for: An Improved Experiment for Measuring Lithium Concentration-Dependent Material Properties of Graphite Composite Electrodes
Source: MDPI journal article supplement (doi:10.3390/nano12244448), 2022-12-14
Supplement: s1 [file s1]

## Supporting information

### **An improved experiment for measuring lithium concentration-dependent material properties of graphite composite electrodes**

**Huibing Liu<sup>a</sup>, Guoxing Zhang<sup>a</sup>, Dawei Li<sup>b\*</sup>, Junqian Zhang<sup>a,c\*</sup>**

a. Shanghai Institute of Applied Mathematics and Mechanics, School of Mechanics

and Engineering Science, Shanghai University, Shanghai 200444, China

b. School of Mechanical Engineering, University of Shanghai for Science and

Technology, Shanghai 200093, China

c. Zhejiang Laboratory, Hangzhou 311100, China

#### ***1. The porosity and the volume fraction of graphite composite electrode***

All electrodes are cut into circular electrode sheets with a diameter of 10 mm and their average mass is weighed. According to the relationship between mass, density and volume, the porosity and the volume fraction of graphite composite electrode are calculated as follows:

$$\varphi = \frac{V_a - V_{\text{CMC}} - V_{\text{SBR}} - V_{\text{Gr}}}{V_a} \times 100\%$$

$$\varepsilon = \frac{V_{\text{Gr}}}{V_a}$$

**Table S1.** Parameters of the 4 types of circular graphite composite electrodes sheet by measurement.

| Parameter     | Description                         | Value                  |                        |                        |                        | Measurement method  |
|---------------|-------------------------------------|------------------------|------------------------|------------------------|------------------------|---------------------|
|               | Electrode No.                       | 1                      | 2                      | 3                      | 4                      |                     |
| $h_a$         | Thickness of active composite layer | 27 $\mu$ m             | 43 $\mu$ m             | 52 $\mu$ m             | 108 $\mu$ m            | Mitutoyo Micrometer |
| $h_c$         | Thickness of current collector      | 22 $\mu$ m             | 22 $\mu$ m             | 22 $\mu$ m             | 22 $\mu$ m             | Mitutoyo Micrometer |
| $m_e$         | Mass of electrode                   | 15.02mg                | 16.84mg                | 17.86mg                | 24.19mg                | Sartorius balance   |
| $m_c$         | Mass of current collector           | 11.95mg                | 11.95mg                | 11.95mg                | 11.95mg                | Sartorius balance   |
| $m_i$         | Mass of active composite layer      | 3.07mg                 | 4.89mg                 | 5.91mg                 | 12.24mg                | Calculated          |
| $\rho_{CMC}$  | Density of CMC                      | 1.6mg/mm <sup>3</sup>  | 1.6mg/mm <sup>3</sup>  | 1.6mg/mm <sup>3</sup>  | 1.6mg/mm <sup>3</sup>  |                     |
| $\rho_{SBR}$  | Density of SBR                      | 1.04mg/mm <sup>3</sup> | 1.04mg/mm <sup>3</sup> | 1.04mg/mm <sup>3</sup> | 1.04mg/mm <sup>3</sup> |                     |
| $\rho_{Gr}$   | Density of graphite                 | 2.2 mg/mm <sup>3</sup> | 2.2 mg/mm <sup>3</sup> | 2.2 mg/mm <sup>3</sup> | 2.2 mg/mm <sup>3</sup> |                     |
| $V_a$         | Volume of active composite layer    | 2.120mm <sup>3</sup>   | 3.377mm <sup>3</sup>   | 4.084mm <sup>3</sup>   | 8.482mm <sup>3</sup>   | Calculated          |
| $V_{CMC}$     | Volume of CMC                       | 0.144mm <sup>3</sup>   | 0.229mm <sup>3</sup>   | 0.277mm <sup>3</sup>   | 0.574mm <sup>3</sup>   | Calculated          |
| $V_{SBR}$     | Volume of SBR                       | 0.074mm <sup>3</sup>   | 0.118mm <sup>3</sup>   | 0.142mm <sup>3</sup>   | 0.294mm <sup>3</sup>   | Calculated          |
| $V_{Gr}$      | Volume of graphite                  | 1.256mm <sup>3</sup>   | 2.000mm <sup>3</sup>   | 2.418mm <sup>3</sup>   | 5.007mm <sup>3</sup>   | Calculated          |
| $\varphi$     | Porosity                            | 30.5%                  | 30.5%                  | 30.5%                  | 30.7%                  | Calculated          |
| $\varepsilon$ | Volume fraction of graphite         | 59.2%                  | 59.2%                  | 59.2%                  | 59%                    | Calculated          |

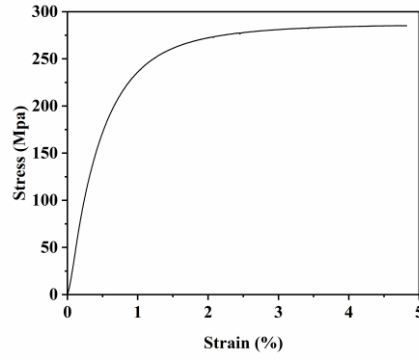

**Figure S1** Stress-strain curve of the copper foil of 22 $\mu\text{m}$ .

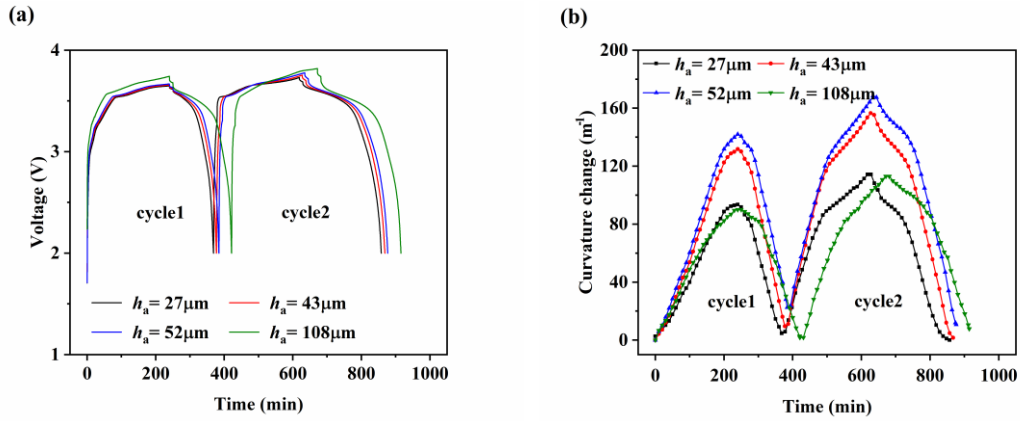

**Figure S2.** Voltage (a) and curvature change (b) in the 1<sup>st</sup> and 2<sup>nd</sup> electrochemical cycling.

## 2. *Effect of distance on Li concentration distribution*

As shown in Fig. S3, an optical electrochemical cell model is established to determine the effect of the distance  $d$  between the working electrode and the counter electrode (Li metal) on the lithium concentration distribution. The model is based on the Newman battery model <sup>[1]</sup>, which has been widely used for Li-ion batteries and is summarized in Table S2. The parameters of the simulation are summarized in Table S3.

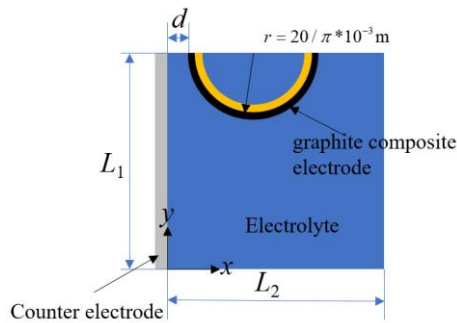

**Figure S3.** Illustration of the optical electrochemical cell structure.

**Table S2.** Newman battery model equations <sup>[1]</sup>.

| Descriptions                                   | Equations                                                                                                                                                                                                                                                       | Boundary Conditions                                                                                                                         |
|------------------------------------------------|-----------------------------------------------------------------------------------------------------------------------------------------------------------------------------------------------------------------------------------------------------------------|---------------------------------------------------------------------------------------------------------------------------------------------|
| Diffusion equation, electrolyte phase          | $\varepsilon_e \frac{\partial c_e}{\partial t} = \nabla \cdot (D_e^{\text{eff}} \nabla c_e) + a(1-t_+^0)j_r$                                                                                                                                                    | $\nabla c_e \cdot \mathbf{n}_l = 0$                                                                                                         |
| Diffusion equation, solid phase                | $\frac{\partial}{\partial t} c_s - \frac{1}{r^2} \frac{\partial}{\partial r} (r^2 D_s \frac{\partial c_s}{\partial r}) = 0$                                                                                                                                     | $\begin{cases} D_s \frac{\partial c_s}{\partial r} \Big _{r=0} = 0 \\ D_s \frac{\partial c_s}{\partial r} \Big _{r=R_s} = -j_r \end{cases}$ |
| Ohm's Law, electrolyte phase                   | $i_e = -\sigma_e^{\text{eff}} \nabla \phi_e + \frac{2\sigma_e^{\text{eff}} RT}{F} \left( 1 + \frac{\partial \ln f}{\partial \ln c_e} \right) (1-t_+^0) \nabla \ln c_e$                                                                                          | $\nabla \phi_e \cdot \mathbf{n}_l = 0$                                                                                                      |
| Ohm's Law, solid phase                         | $i_s = -\sigma_s^{\text{eff}} \nabla \phi_s$                                                                                                                                                                                                                    | $-\sigma^{\text{eff}} \nabla \phi_s \cdot \mathbf{n}_l = -i_L$                                                                              |
| Butler–Volmer kinetics, Solid-liquid interface | $i = i_0 \left\{ \exp \left( \frac{0.5F}{RT} \eta \right) - \exp \left( \frac{-0.5F}{RT} \eta \right) \right\}$<br>$i_0 = Fk_0 c_e^{1-\alpha} (c_{\text{max}} - c_{\text{surf}})^{1-\alpha} c_{\text{surf}}^\alpha$<br>$\eta = \phi_s - \phi_e - E_{\text{eq}}$ |                                                                                                                                             |

**Table S3.** Parameters employed in simulations for the optical electrochemical cell.

| Parameter               | Description                                                                                      | Value                                                                                                                     |
|-------------------------|--------------------------------------------------------------------------------------------------|---------------------------------------------------------------------------------------------------------------------------|
| $\mathbf{n}_l$          | Unit normal vector at the interface between the current collector and the active composite layer |                                                                                                                           |
| $L_1$                   | The length of the cell [mm]                                                                      | 30                                                                                                                        |
| $L_2$                   | The width of the cell [mm]                                                                       | 30                                                                                                                        |
| $h_a$                   | the thickness of the active layer [ $\mu\text{m}$ ]                                              | 43                                                                                                                        |
| $L$                     | the length of graphite composite electrode [mm]                                                  | 20                                                                                                                        |
| $r_c$                   | the radius of the curved electrode [mm]                                                          | $r_c = \frac{L}{\pi}$                                                                                                     |
| $R_s$                   | the diameter of graphite particles [ $\mu\text{m}$ ]                                             | 15                                                                                                                        |
| $i_L$                   | external current [-2.09A/m <sup>2</sup> ]                                                        | $i_L = \int_L idL$<br>$L: y = L_1 - \sqrt{r_c^2 - (x - d - r_c)^2}$                                                       |
| $D_s$                   | the diffusivity of lithium in solid phases [m <sup>2</sup> /s]                                   | $1.4523 \times 10^{-13} \cdot \exp \left[ 68025.7 / 8.314 \cdot \left( \frac{1}{318} - \frac{1}{T} \right) \right]^{[2]}$ |
| $\varepsilon$           | the volume fraction of solid phase [%]                                                           | 59.2                                                                                                                      |
| $c_{s,0}$               | the initial concentration in solid phase [mol/m <sup>3</sup> ]                                   | 1000                                                                                                                      |
| $c_{s,\text{max}}$      | the maximum concentration in the solid phase [mol/m <sup>3</sup> ]                               | 31507                                                                                                                     |
| $\sigma_s^{\text{eff}}$ | the electric conductivity in solid electrode [S/m]                                               | 100 <sup>[2]</sup>                                                                                                        |
| $E_{\text{eq}}$         | the electrode potential at equilibrium state [V]                                                 | $f_1(c) + f_2(c)(T - 298)$ <sup>[2]</sup>                                                                                 |
| $a$                     | the surface to volume ratio of graphite [1/m]                                                    | $a = \frac{3\varepsilon_s}{R_s}$                                                                                          |
| $D_e^{\text{eff}}$      | the diffusivity of lithium in liquid electrolyte [m <sup>2</sup> /s]                             | $f_3(c) \cdot \exp \left[ 16500 / 8.314 \left( \frac{1}{298} - \frac{1}{T} \right) \right]^{[2]}$                         |
| $\varepsilon_e$         | the volume fraction of liquid electrolyte in graphite composite electrode [%]                    | 30.5                                                                                                                      |
| $c_{e,0}$               | the initial concentration in liquid electrolyte [mol/m <sup>3</sup> ]                            | 1000                                                                                                                      |

|                         |                                           |                                                                                                           |
|-------------------------|-------------------------------------------|-----------------------------------------------------------------------------------------------------------|
| $\sigma_e^{\text{eff}}$ | the liquid electrolyte conductivity [S/m] | $f_4(c) \cdot \exp \left[ 4000 / 8.314 \left( \frac{1}{298} - \frac{1}{T} \right) \right]$ <sup>[2]</sup> |
| $f$                     | the activity coefficient                  | $f_5(c) \cdot \exp \left[ -1000 / 8.314 \left( -\frac{1}{T} \right) \right]$ <sup>[2]</sup>               |
| $t_+^0$                 | the transference number                   | 0.2594 <sup>[3]</sup>                                                                                     |
| $k_0$                   | the reaction rate constant [m/s]          | 2.123e-10 <sup>[4]</sup>                                                                                  |
| $T$                     | Temperature [K]                           | 298                                                                                                       |
| $f_i(c)$                | the interpolation function                |                                                                                                           |

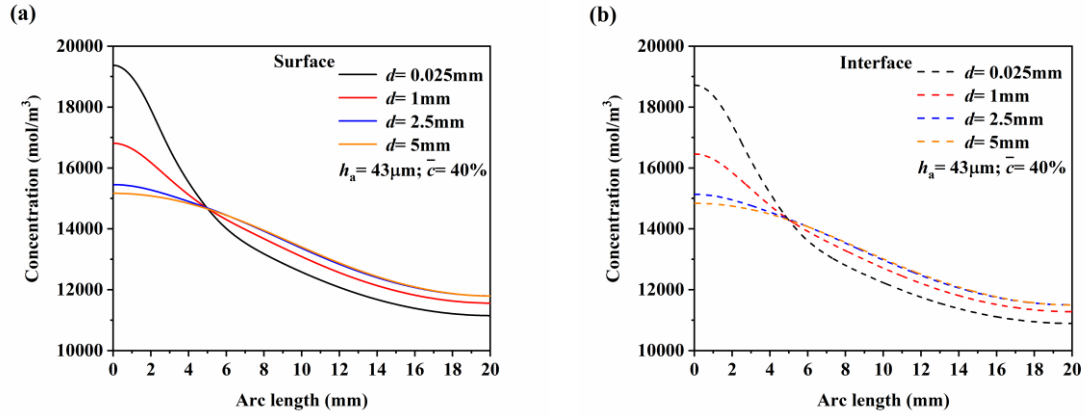

**Figure S4.** The distribution of Li concentration along the length of the curved electrode: (a) surface, (b) interface.

As shown in Fig. S4, the simulation results show that the lithium concentration decreases along the length of the curved electrode. When the distance between the working electrode and the counter electrode is increased, the lithium concentration gradient along the length direction of the curved electrode gradually decreases. Therefore, the distance between the two electrodes can be adjusted to make the distribution of lithium in the active composite layer more uniform.

**Table S4.** Curvature change data of the 4 electrodes in the 4<sup>th</sup> charging.

| Normalized<br>concentration<br>(%) | Curvature change (m <sup>-1</sup> ) |             |             |             |
|------------------------------------|-------------------------------------|-------------|-------------|-------------|
|                                    | Electrode 1                         | Electrode 2 | Electrode 3 | Electrode 4 |
| 0.00                               | 0.00                                | 0.00        | 0.00        | 0.00        |
| 1.67                               | 3.68                                | 5.85        | 6.72        | 7.12        |
| 3.33                               | 9.99                                | 16.24       | 18.09       | 15.73       |
| 5.00                               | 17.98                               | 28.06       | 31.23       | 24.96       |
| 6.67                               | 25.26                               | 38.33       | 40.41       | 29.53       |
| 8.33                               | 34.54                               | 48.74       | 51.95       | 37.14       |
| 10.00                              | 42.29                               | 58.48       | 61.50       | 44.17       |
| 11.67                              | 50.41                               | 67.66       | 71.16       | 50.45       |
| 13.33                              | 57.28                               | 76.94       | 79.93       | 56.41       |
| 15.00                              | 65.22                               | 84.71       | 87.19       | 61.32       |
| 16.67                              | 70.83                               | 92.59       | 94.85       | 66.29       |
| 18.33                              | 77.38                               | 99.33       | 102.00      | 71.54       |
| 20.00                              | 81.23                               | 105.40      | 108.53      | 75.39       |
| 21.67                              | 84.68                               | 110.82      | 114.28      | 79.72       |
| 23.33                              | 88.12                               | 114.20      | 117.25      | 82.66       |
| 25.00                              | 90.19                               | 117.77      | 121.14      | 84.48       |
| 26.67                              | 92.69                               | 121.97      | 126.01      | 88.10       |
| 28.33                              | 95.89                               | 126.24      | 130.58      | 90.46       |
| 30.00                              | 98.43                               | 129.65      | 135.00      | 93.60       |
| 31.67                              | 101.62                              | 133.30      | 138.23      | 96.37       |
| 33.33                              | 104.90                              | 136.87      | 141.09      | 97.88       |
| 35.00                              | 107.89                              | 140.89      | 144.17      | 99.99       |
| 36.67                              | 111.68                              | 144.84      | 149.21      | 103.18      |
| 38.33                              | 114.04                              | 148.50      | 153.13      | 106.62      |
| 40.00                              | 116.11                              | 151.76      | 156.76      | 109.24      |

## References

- [1]. M. Doyle, T. F. Fuller, and J. Newman, “Modeling of Galvanostatic Charge and Discharge of the Lithium/Polymer/Insertion Cell.” *Journal of The Electrochemical Society*, **140**, 1526 (1993)
- [2]. J. Nie, S. Sun, Y. Song, B. Lu, A. Soh, and J.Q. Zhang, “Impacts of electrode shape on lithiation performance: the edge effect on lithium intercalation.” *Journal of Energy Storage*, **47**, 103568 (2021)
- [3]. W. Ai, N. Kirkaldy, Y. Jiang , G. Offer, H. Wang, and B. Wu, “A composite electrode model for lithium-ion batteries with silicon/graphite negative electrodes.” *Journal of Power Sources*, **527**, 231142 (2022)

- [4]. C.H. Chen, F. Brosa Planella, K. O'Regan, D. Gastol, W.D. Widanage, and E. Kendrick, "Development of experimental techniques for parameterization of multi-scale lithium-ion battery models." *Journal of The Electrochemical Society*, **167**, 080534 (2020)
